# Supplementary material
Source: PubMed Central journal article supplement (PMC3999641)
Supplement: NIHMS540054-supplement-01.pdf [file NIHMS540054-supplement-01.pdf]

1  
2  
3  
4  
5  
6  
7  
8  
9  
10  
11  
12  
13  
14  
15  
16  
17  
18  
19  
20  
21  
22  
23  
24  
25  
26  
27  
28  
29  
30  
31  
32  
33  
34  
35  
36  
37  
38  
39  
40  
41  
42  
43  
44  
45  
46  
47  
48  
49  
50  
51  
52  
53  
54  
55  
56  
57  
58  
59  
60  
61  
62  
63  
64  
65

Table S1. Item Analysis and Average Severity Scores on Children’s Yale–Brown Obsessive Compulsive Scale for Children With Autism Spectrum Disorder (CYBOCS-ASD) (N=272)

| Item         | M (SD)     | $\alpha$ Value with Item Removed <sup>a</sup> |
|--------------|------------|-----------------------------------------------|
| Time spent   | 2.86 (.94) | .76                                           |
| Interference | 2.43 (.91) | .76                                           |
| Distress     | 2.73 (.86) | .76                                           |
| Resistance   | 3.45 (.79) | .79                                           |
| Control      | 3.32 (.75) | .77                                           |

Note: <sup>a</sup>Overall Cronbach’s alpha = 0.81

1  
2  
3  
4  
5  
6  
7  
8  
9  
10  
11  
12  
13  
14  
15  
16  
17  
18  
19  
20  
21  
22  
23  
24  
25  
26  
27  
28  
29  
30  
31  
32  
33  
34  
35  
36  
37  
38  
39  
40  
41  
42  
43  
44  
45  
46  
47  
48  
49  
50  
51  
52  
53  
54  
55  
56  
57  
58  
59  
60  
61  
62  
63  
64  
65

Table S2. Pearson Correlations Between Children’s Yale–Brown Obsessive Compulsive Scale for Children With Autism Spectrum Disorder (CYBOCS-ASD) Total Scores for Full Sample (N=272)

|                                               | <i>r</i> | M (SD)      |
|-----------------------------------------------|----------|-------------|
| Child and Adolescent Symptom Inventory (CASI) | .11      | 14.7 (9.5)  |
| Anxiety Scale                                 | .32*     | 22.2 (7.6)  |
| PDD scale                                     |          |             |
| Vineland Adaptive Behavior Scales             | -.27*    | 54.9 (20.9) |
| Communication                                 | -.30*    | 46.0 (20.2) |
| Socialization                                 | -.26*    | 48.1 (17.4) |
| Daily Living                                  |          |             |
| Aberrant Behavior Checklist                   |          |             |
| Irritability                                  | .32*     | 25.4 (9.3)  |
| Social Withdrawal                             | .31*     | 15.0 (8.9)  |
| Stereotypy                                    | .31*     | 8.7 (5.4)   |
| Hyperactivity                                 | .25*     | 34.1 (8.7)  |
| Inappropriate Speech                          | .14      | 5.9 (3.8)   |

Note: CASI = Child and Adolescent Symptom Inventory; PDD = pervasive developmental disorder.

\* $p \leq .001$
